# Supplementary material for: Deep Learning Methods Applied to Drug Concentration Prediction of Olanzapine
Source: MDPI journal article supplement (doi:10.3390/pharmaceutics15041139), 2023-04-04
Supplement: s1 [file s1]

**Supplemental Table S1.** Parameters of the Bayesian Optimization Algorithms

| Package          | Surrogate Model                                         | Acquisition Function | Number of Trials | Direction | Loss Function      |
|------------------|---------------------------------------------------------|----------------------|------------------|-----------|--------------------|
| Sci-kit Optimize | Gaussian Process                                        | Expected Improvement | 20               | Minimize  | Mean Squared Error |
|                  | Random Forest                                           |                      |                  |           |                    |
|                  | Gradient Boosted Trees                                  |                      |                  |           |                    |
|                  | Random Search                                           |                      |                  |           |                    |
| Optuna           | Tree Structured Parzen Estimators with Hyperband Pruner | Expected Improvement | 20               | Minimize  | Mean Squared Error |

**Supplemental Table S2.** Readings from each of the hyperparameter optimization algorithms

| Models                                                  | Number of L and A layers | Training MSE | Testing MSE | Training RMSE | Testing RMSE |
|---------------------------------------------------------|--------------------------|--------------|-------------|---------------|--------------|
| Tree Structured Parzen Estimators with Hyperband Pruner | LSTM1ANN1                | 367.899      | 912.905     | 19.181        | 30.214       |
|                                                         | LSTM1ANN2                | 343.481      | 873.53      | 18.533        | 29.556       |
|                                                         | LSTM1ANN3                | 455.955      | 931.309     | 21.353        | 30.517       |
|                                                         | LSTM2ANN1                | 399.748      | 919.197     | 19.994        | 30.302       |
|                                                         | LSTM2ANN2                | 354.938      | 951.785     | 18.840        | 30.851       |
|                                                         | LSTM2ANN3                | 599.12       | 841.295     | 24.477        | 29.005       |
|                                                         | LSTM3ANN1                | 480.403      | 879.11      | 21.918        | 29.650       |
|                                                         | LSTM3ANN2                | 443.173      | 910.915     | 21.052        | 30.181       |
|                                                         | LSTM3ANN3                | 405.67       | 920.319     | 20.141        | 30.337       |
| Gaussian Process                                        | LSTM1ANN1                | 534.001      | 907.881     | 23.108        | 30.131       |
|                                                         | LSTM1ANN2                | 437.399      | 950.627     | 20.914        | 30.832       |
|                                                         | LSTM1ANN3                | 271.937      | 986.318     | 16.491        | 31.406       |
|                                                         | LSTM2ANN1                | 423.955      | 891.941     | 20.590        | 29.865       |
|                                                         | LSTM2ANN2                | 404.292      | 870.469     | 20.107        | 29.504       |
|                                                         | LSTM2ANN3                | 420.726      | 908.186     | 20.512        | 30.136       |
|                                                         | LSTM3ANN1                | 425.911      | 882.381     | 20.638        | 29.705       |
|                                                         | LSTM3ANN2                | 388.991      | 901.757     | 19.723        | 30.029       |
|                                                         | LSTM3ANN3                | 408.874      | 876.527     | 20.221        | 29.606       |
| Random Forest                                           | LSTM1ANN1                | 423.527      | 922.805     | 20.573        | 30.378       |
|                                                         | LSTM1ANN2                | 258.520      | 1027.620    | 16.079        | 32.057       |
|                                                         | LSTM1ANN3                | 272.105      | 951.971     | 16.496        | 30.540       |
|                                                         | LSTM2ANN1                | 365.503      | 957.418     | 19.118        | 30.942       |
|                                                         | LSTM2ANN2                | 360.218      | 953.608     | 18.979        | 30.881       |
|                                                         | LSTM2ANN3                | 461.560      | 926.311     | 21.484        | 30.435       |
|                                                         | LSTM3ANN1                | 374.541      | 879.306     | 19.353        | 29.955       |
|                                                         | LSTM3ANN2                | 335.554      | 866.907     | 18.236        | 29.443       |
|                                                         | LSTM3ANN3                | 471.646      | 902.648     | 21.717        | 30.044       |

|                        |           |         |          |        |        |
|------------------------|-----------|---------|----------|--------|--------|
| Gradient Boosted Trees | LSTM1ANN1 | 245.262 | 1014.778 | 15.661 | 31.856 |
|                        | LSTM1ANN2 | 393.817 | 941.132  | 19.845 | 30.678 |
|                        | LSTM1ANN3 | 343.515 | 917.030  | 18.534 | 30.283 |
|                        | LSTM2ANN1 | 437.909 | 949.287  | 20.926 | 30.811 |
|                        | LSTM2ANN2 | 331.613 | 967.444  | 18.210 | 31.104 |
|                        | LSTM2ANN3 | 433.662 | 905.407  | 20.825 | 30.090 |
|                        | LSTM3ANN1 | 377.004 | 899.096  | 19.417 | 29.985 |
|                        | LSTM3ANN2 | 383.052 | 896.525  | 19.572 | 29.942 |
|                        | LSTM3ANN3 | 203.945 | 959.406  | 14.281 | 30.974 |
| Random Search          | LSTM1ANN1 | 443.572 | 938.193  | 21.061 | 30.630 |
|                        | LSTM1ANN2 | 462.634 | 967.990  | 21.509 | 31.113 |
|                        | LSTM1ANN3 | 323.297 | 1028.026 | 17.980 | 32.063 |
|                        | LSTM2ANN1 | 501.100 | 907.351  | 22.385 | 30.122 |
|                        | LSTM2ANN2 | 381.616 | 952.065  | 19.535 | 30.856 |
|                        | LSTM2ANN3 | 433.662 | 905.407  | 20.825 | 30.090 |
|                        | LSTM3ANN1 | 377.004 | 899.096  | 19.417 | 29.985 |
|                        | LSTM3ANN2 | 503.652 | 895.531  | 22.442 | 29.925 |
|                        | LSTM3ANN3 | 471.713 | 919.307  | 21.719 | 30.320 |

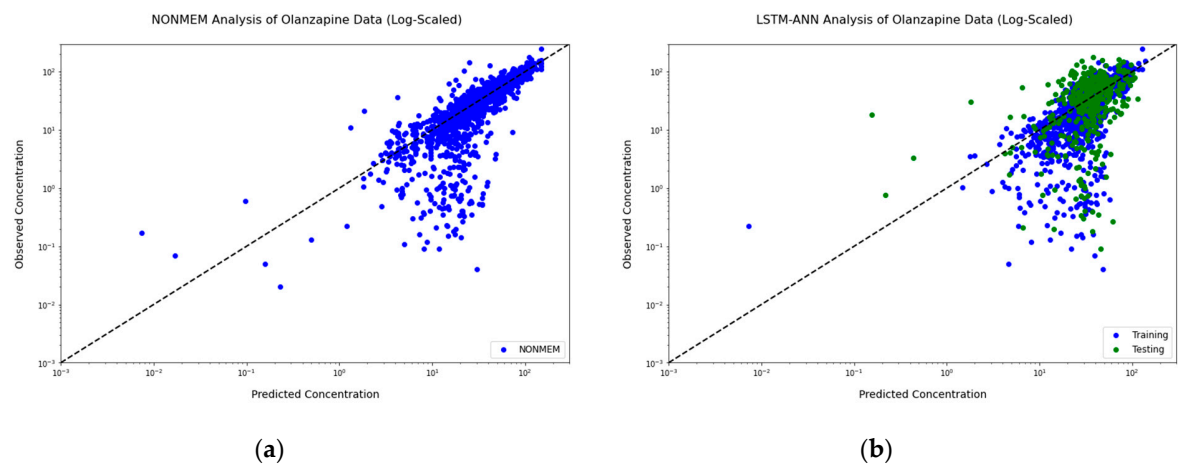

**Supplemental Figure S1.** Observations vs. Prediction plot in a log scale from the different modeling approaches. **(a)** NONMEM (note: predictions are individual predictions [IPRED]); **(b)** LSTM-ANN (The different colors correspond to drug concentration predictions from the different datasets. Blue represents the training data, and the green represents the validation data.)
